# Supplementary material for: STAT3 signaling contributes to the high effector activities of interleukin-15-derived dendritic cells
Source: PubMed Central journal article supplement — Immunol Cell Biol. 2015 Jan 13;93(5):461–71. doi: 10.1038/icb.2014.103 (PMC4450366; doi:10.1038/icb.2014.103), 2015-01-13
Supplement: icb2014103x1.pdf [file icb2014103x1.pdf]

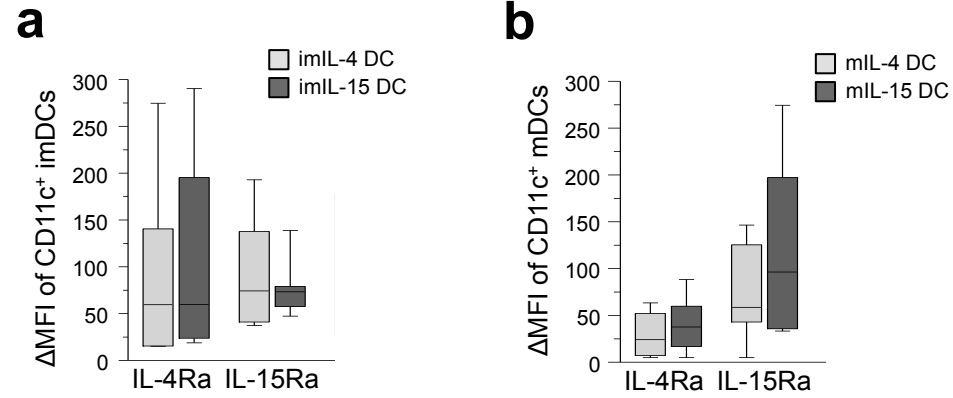

Supplementary Table S1. Expression of STAT-responsive genes in mDCs

| Symbol                                            | Gene Name                                       | Accession   | Probe Signal |           | Fold Change<br>(mIL-15 DC vs mIL-4 DC) |
|---------------------------------------------------|-------------------------------------------------|-------------|--------------|-----------|----------------------------------------|
|                                                   |                                                 |             | mIL-4 DC     | mIL-15 DC |                                        |
| <i>Genes up-regulated by STAT3</i>                |                                                 |             |              |           |                                        |
| MMP9                                              | matrix metalloproteinase 9                      | NM_004994.1 | 275.7        | 10731.3   | 38.92                                  |
| CCND1                                             | cyclin D1                                       | NM_053056.1 | 60.3         | 236.7     | 3.93                                   |
| SOCS3                                             | suppressor of cytokine signaling 3              | NM_003955.3 | 5.3          | 14.6      | 2.75                                   |
| CEBPD                                             | CCAAT/enhancer binding protein (C/EBP), delta   | NM_005195.2 | 290.3        | 586.4     | 2.02                                   |
| IL6                                               | interleukin 6                                   | NM_000600.1 | 82.5         | 130.8     | 1.59                                   |
| <i>Genes down-regulated by STAT3</i>              |                                                 |             |              |           |                                        |
| LAMP3                                             | lysosomal-associated membrane protein 3         | NM_014398.2 | 14816.8      | 75.5      | -196.25                                |
| CD80                                              | CD80 antigen                                    | NM_005191.2 | 763.2        | 63.5      | -12.02                                 |
| CD86                                              | CD86 antigen                                    | NM_175862.2 | 1142.3       | 388.7     | -2.94                                  |
| <i>Genes up-regulated by STAT5</i>                |                                                 |             |              |           |                                        |
| IGFBP4                                            | insulin-like growth factor binding protein 4    | NM_001552.1 | 1766.5       | 62.4      | -28.31                                 |
| OSM                                               | oncostatin M                                    | NM_020530.3 | 328.3        | 36.6      | -8.97                                  |
| SOCS2                                             | suppressor of cytokine signaling 2              | NM_003877.3 | 1564         | 250.8     | -6.24                                  |
| IL2RA                                             | interleukin 2 receptor, alpha (CD25)            | NM_000417.1 | 91.2         | 19.8      | -4.61                                  |
| CISH                                              | cytokine inducible SH2-containing protein (CIS) | NM_145071.1 | 1180.8       | 437.1     | -2.70                                  |
| CEBPA                                             | CCAAT/enhancer binding protein (C/EBP), alpha   | NM_004364.2 | 1464.6       | 1511.6    | 1.03                                   |
| CCND2                                             | cyclin D2                                       | NM_001759.2 | 3160.6       | 5568.9    | 1.76                                   |
| <i>Genes up-regulated by STAT6</i>                |                                                 |             |              |           |                                        |
| FCER2                                             | Fc fragment of IgE, low affinity II (CD23)      | NM_002002.3 | 6013.3       | 1520.5    | -3.95                                  |
| GATA3                                             | GATA binding protein 3                          | NM_002051.1 | 80.2         | 56.7      | -1.41                                  |
| IL4                                               | interleukin 4                                   | NM_172348.1 | 2.3          | 3.5       | 1.52                                   |
| <i>Genes regulated by STAT3, STAT5, and STAT6</i> |                                                 |             |              |           |                                        |
| SOCS1                                             | suppressor of cytokine signaling 1              | NM_003745.1 | 1187.4       | 43.1      | -27.55                                 |
| BCL2L1                                            | BCL2-like 1 (BCL-xL)                            | NM_001191.2 | 3859.6       | 1345.1    | -2.87                                  |
